# Supplementary material for: Characterization of a versatile organometallic pro-drug (CORM) for experimental CO based therapeutics
Source: Royal Society of Chemistry journal article supplement (doi:10.1039/c2dt32174b), 2012-11-16
Supplement: c2dt32174b.pdf [file c2dt32174b.pdf]

## Supporting Information

### For the manuscript

#### **Characterization of a versatile organometallic pro-drug (CORM) for experimental CO based therapeutics.**

João D. Seixas<sup>1\*</sup>, Abhik Mukhopadhyay<sup>\*2</sup>, Teresa Santos-Silva<sup>2</sup>, Leo E Otterbein<sup>3</sup>, David J. Gallo<sup>3</sup>, Sandra S. Rodrigues<sup>1</sup>, Bruno H. Guerreiro<sup>1</sup>, Ana M. L. Gonçalves<sup>1</sup>, Nuno Penacho<sup>1</sup>, Ana R. Marques<sup>1</sup>, Ana C. Coelho,<sup>4</sup> Patrícia M. Reis,<sup>4</sup> Maria J. Romão<sup>2</sup> and Carlos C. Romão<sup>1,4</sup>

1. Alfama Lda, Taguspark, núcleo central 267, 2740-122 Porto Salvo, Portugal

2. REQUIMTE, Departamento de Química, Faculdade de Ciências e Tecnologia, Universidade Nova de Lisboa, 2829-516 Caparica, Portugal

\* as joint first author

3. Harvard Medical School, Department of Surgery, Transplant Institute, Department of Surgery, Beth Israel Deaconess Medical Center, Boston, MA 02215

4. Instituto de Tecnologia Química e Biológica da Universidade Nova de Lisboa, Av. da República, EAN, 2780-157 Oeiras, Portugal

[ccr@alfama.com.pt](mailto:ccr@alfama.com.pt); [ccr@itqb.unl.pt](mailto:ccr@itqb.unl.pt)

## Supporting Information

### Table of Contents

|                                                                                          | Page |
|------------------------------------------------------------------------------------------|------|
| CO release tables                                                                        | 2    |
| UV-Vis absorbance spectra of ALF186 upon incubation with Hb, Mb<br>and Cyt c             | 4    |
| UV-Vis absorbance spectra of CORM3 upon incubation with Cyt c                            | 5    |
| Time evolution of UV-VIS absorption spectrum of ALF186 upon<br>incubation with HSA (5:1) | 6    |
| Hemolytic Index of ALF186 in sheep RBC                                                   | 7    |
| CO release of ALF186 upon incubation with BSA (41:1)                                     | 8    |

## Supporting Information

**Table S1:** Equivalents of CO released to the headspace by ALF186 in distilled water (pH~5.5) in the dark, at 37°C in aerobic and anaerobic conditions

| Time (h) | Equivalents of CO ( $\pm 0.05$ ) released to the headspace in distilled H <sub>2</sub> O (pH ~ 5.5), in the dark at 37°C |         |
|----------|--------------------------------------------------------------------------------------------------------------------------|---------|
|          | anaerobic                                                                                                                | aerobic |
| 0.5      | 0.00                                                                                                                     | 1.02    |
| 2        | 0.00                                                                                                                     | 2.26    |
| 4        | 0.08                                                                                                                     | 2.57    |
| 6        | 0.00                                                                                                                     | 2.60    |
| 24       | 0.15                                                                                                                     | 2.61    |

## Supporting Information

**Table S2:** Equivalents of CO released to the headspace by ALF186 in several media and conditions

|          | Solvent                                     |                                            |                               |                                     |                                                   |                           |
|----------|---------------------------------------------|--------------------------------------------|-------------------------------|-------------------------------------|---------------------------------------------------|---------------------------|
|          | Saline<br>(rt/dark/normoxic)                | Saline<br>(rt/dark/anoxic N <sub>2</sub> ) | PBS 7.4<br>(rt/dark/normoxic) | RPMI/FBS(10%)<br>(rt/dark/normoxic) | RPMI/FBS(10%)<br>(rt/dark/anoxic N <sub>2</sub> ) | FBS<br>(rt/dark/normoxic) |
| Time (h) | Equivalents of CO released to the headspace |                                            |                               |                                     |                                                   |                           |
| 0.5      | 0.77±0.03                                   | 0.05±0.04                                  | 0.93±0.03                     | ---                                 | ---                                               | ---                       |
| 2        | 2.19±0.03                                   | 0.07±0.04                                  | 2.55±0.03                     | 1.88±0.07                           | 0.02                                              | 2.15±0.06                 |
| 4        | 2.34±0.04                                   | 0.09±0.04                                  | ---                           | 2.09±0.07                           | 0.11                                              | 2.13±0.06                 |
| 6        | 2.24±0.04                                   | 0.00                                       | ---                           | 2.21±0.07                           | 0.16                                              | 2.28±0.06                 |

**Table S3:** Equivalents of CO released to the headspace by ALF186 in H<sub>2</sub>O at pH 2.5, pH~5.5, pH 8.5 and in PBS (pH 7.4), in the dark, in air, at 37°C.

| Time<br>(h) | H <sub>2</sub> O<br>(pH 2.5) | H <sub>2</sub> O<br>(pH ~ 5.5) | H <sub>2</sub> O<br>(pH 8.5) | PBS<br>(pH 7.4) |
|-------------|------------------------------|--------------------------------|------------------------------|-----------------|
| 2           | 1.3                          | 2.3                            | 2.7                          | 2.7             |
| 4           | 1.5                          | 2.5                            | 2.9                          | 2.8             |
| 6           | 1.4                          | 2.5                            | 2.7                          | 2.8             |

## Supporting Information

**Table S4:** Equivalents of CO released by ALF186 in PBS7.4, in air, in the dark at room temperature at 30min, 1h, 1h30min and 2h.

| <b>Time<br/>(Hours)</b> | <b>PBS<br/>(pH 7.4)</b> |
|-------------------------|-------------------------|
| 0.5                     | 0.8                     |
| 1                       | 1.3                     |
| 1.5                     | 1.9                     |
| 2                       | 2.2                     |

## Supporting Information

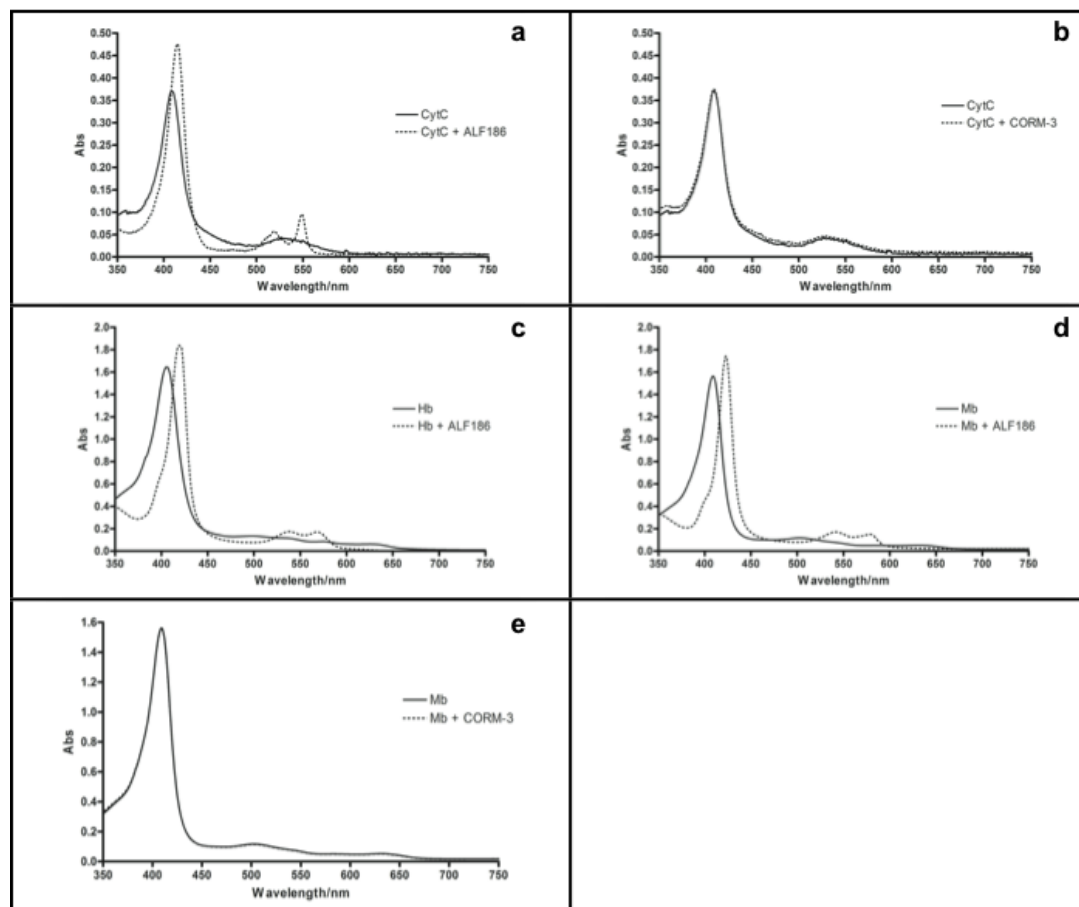

**Figure S1:** UV-Vis absorbance spectra of: **a)** oxidized cyt *c* (5  $\mu$ M) before and immediately after incubation with ALF186 (50  $\mu$ M); **b)** oxidized cyt *c* (5  $\mu$ M) before and after 1 h incubation with CORM-3 (50  $\mu$ M); **c)** oxidized bovine Hb (5  $\mu$ M) before and immediately after incubation with ALF186 (50  $\mu$ M); **d)** oxidized Mb (11  $\mu$ M) before and immediately after incubation ALF186 (50  $\mu$ M); **e)** oxidized Mb (11  $\mu$ M) before and after 2h incubation with CORM-3 (50  $\mu$ M). All spectra have been recorded in PBS7.4 at rt.

## Supporting Information

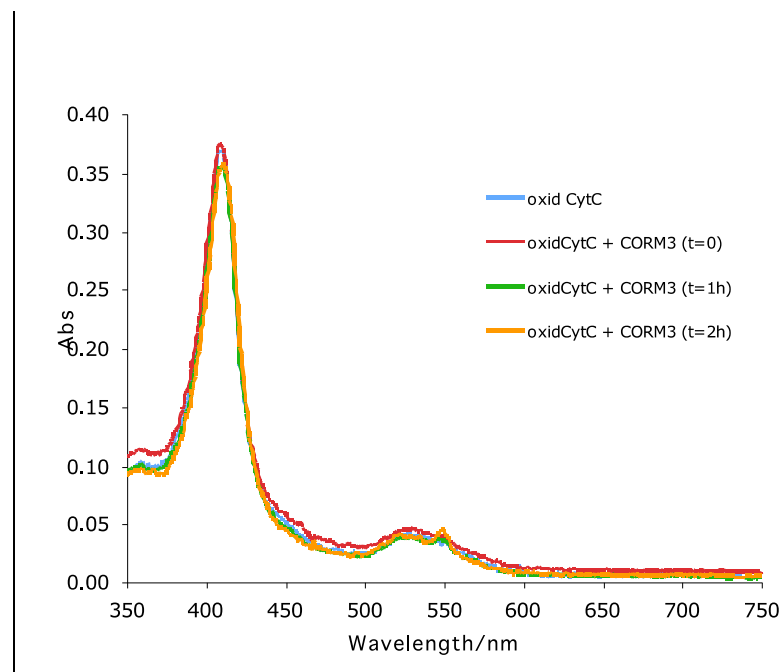

**Figure S2:** Time evolution of UV-Vis absorbance spectrum of oxidized cytochrome c (5 μM) before (blue line) and after addition of CORM-3 (50 μM) at t=0 (red line), 1 h (green line) and 2 h (orange line).

### Supporting Information

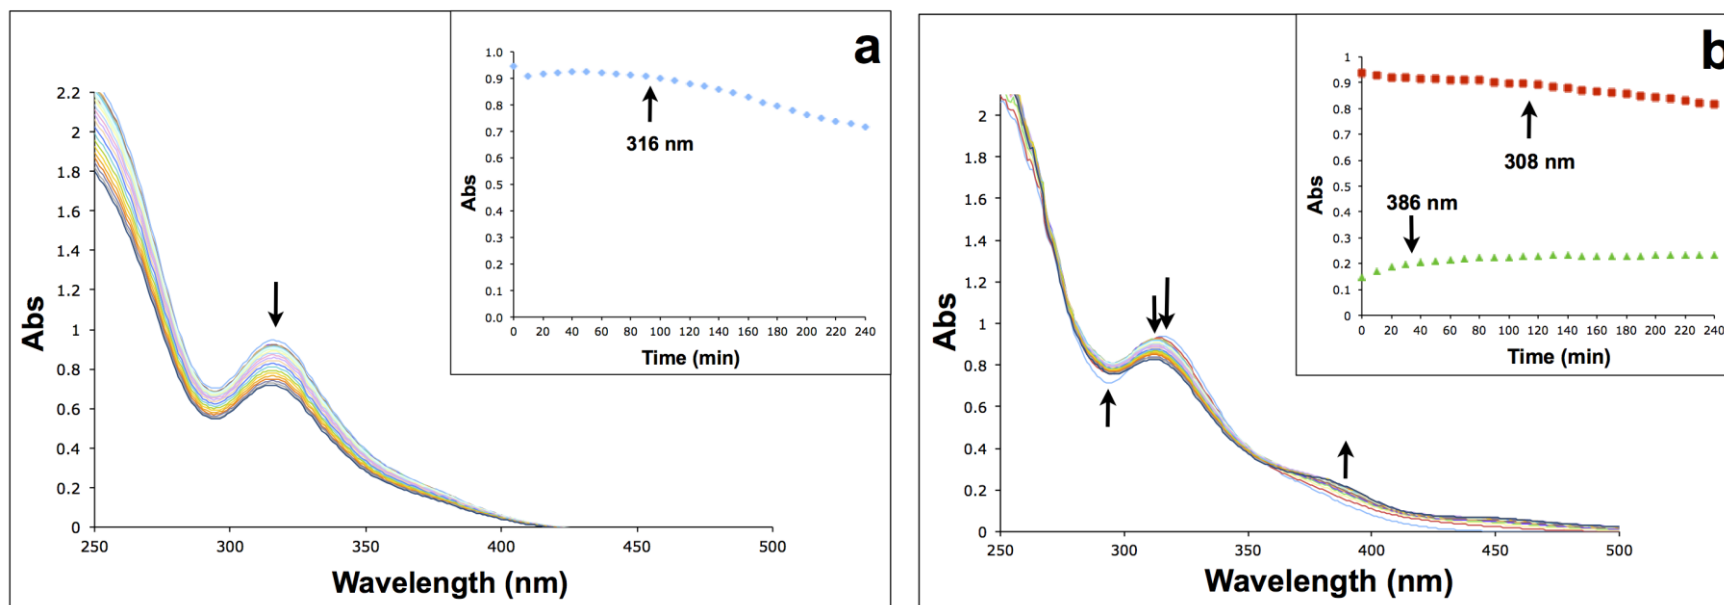

**Figure S3:** Time evolution of UV-Vis absorption spectrum of ALF186 in PBS7.4 at rt, under anaerobic conditions. a) pure ALF186 (250 μM); b) ALF186 and HSA (250 μM and 50 μM respectively; HSA spectrum subtracted). The variation of the absorbances with time is given in the insets.



### Supporting Information

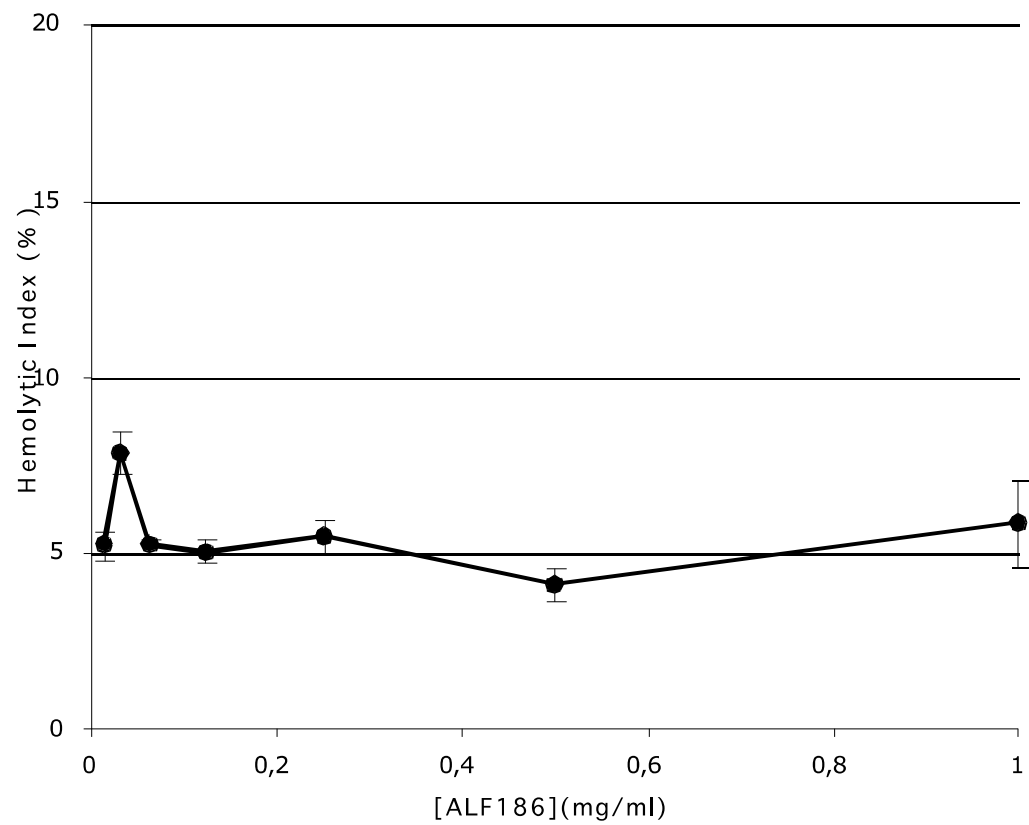

**Figure S4:** Hemolytic index induced by ALF186 in concentrations between 0.0078 and 1 mg/mL in sheep RBC.

### Supporting Information

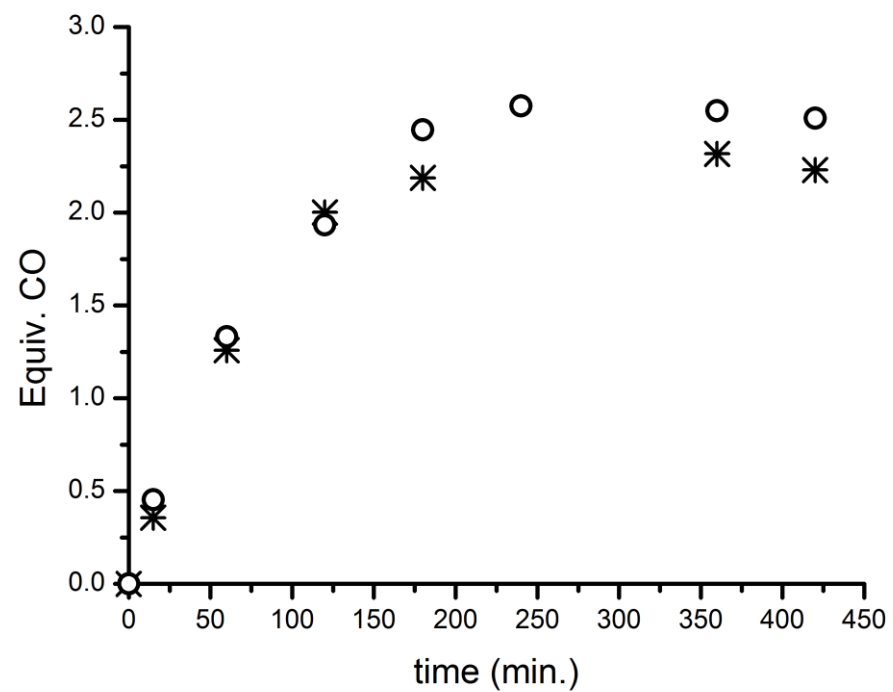

**Figure S5.** Equivalents of CO released from ALF186 in PBS7.4 solution (O) and in the presence of BSA, with a ratio of 41:1 (\*), along the time. An assay involving ALF186 and the BSA in an inert atmosphere at the same concentrations did not produce CO or CO<sub>2</sub> in the headspace.
